# Supplementary material for: The synthesis of thermoresponsive POSS-based eight-arm star poly(N-isopropylacrylamide): A comparison between Z-RAFT and R-RAFT strategies
Source: Royal Society of Chemistry journal article supplement (doi:10.1039/d1py00087j), 2021-01-01
Supplement: d1py00087j1.pdf [file d1py00087j1.pdf]

## Supporting Information for:

### **The synthesis of thermoresponsive POSS-based eight-arm star poly(*N*-isopropylacrylamide): A comparison between Z-RAFT and R-RAFT strategies**

Bo Pang,<sup>a</sup> Rui Liu,<sup>a</sup> Guang Han,<sup>\*,b</sup> Wei Wang<sup>\*,c</sup> and Wangqing Zhang<sup>\*,a,d</sup>

<sup>a</sup> Key Laboratory of Functional Polymer Materials of the Ministry of Education, Institute of Polymer Chemistry, College of Chemistry, Nankai University, Tianjin 300071, China. E-mail: [wqzhang@nankai.edu.cn](mailto:wqzhang@nankai.edu.cn), Tel: 86-22-23509794, Fax: 86-22-23503510.

<sup>b</sup> State Key Laboratory of Special Functional Waterproof Materials, Beijing Oriental Yuhong Waterproof Technology Co., Ltd. Beijing 100123, China. E-mail: [hanguang@yuhong.com.cn](mailto:hanguang@yuhong.com.cn).

<sup>c</sup> School of Chemistry & Material Science, Langfang Normal University, Langfang, 065000, China. E-mail: [wangwei@lfnu.edu.cn](mailto:wangwei@lfnu.edu.cn).

<sup>d</sup> Collaborative Innovation Center of Chemical Science and Engineering (Tianjin), Nankai University, Tianjin 300071, China.

## 1. Synthesis of R-Type eight-trithiocarbonate functionalized POSS (POSS-TTC-R)

Into a flask with a magnetic stirrer under argon atmosphere, DDMAT (1.75 g, 4.8 mmol) and  $\text{CH}_2\text{Cl}_2$  (20 mL) were added, and then  $(\text{COCl})_2$  (1.7 mL, 20.0 mmol) dissolved in  $\text{CH}_2\text{Cl}_2$  (20 mL) was added dropwise into the flask at room temperature, and the mixture was stirred for 6 h. The remaining  $(\text{COCl})_2$  and  $\text{CH}_2\text{Cl}_2$  were removed by rotary evaporation under vacuum. Into the above-mentioned flask, POSS-OH (0.412 g, 0.30 mmol) dissolved in THF (20 mL) was poured, and the mixture was stirred for 24 h at room temperature under argon atmosphere. After removal of THF, the crude product was purified by silica gel column chromatography employing the ethyl acetate/n-hexane mixture (1:10 by volume) to afford R-Type eight-trithiocarbonate functionalized POSS (POSS-TTC-R, 64% yield). Fig. S1 shows the  $^1\text{H}$  NMR spectra of POSS-TTC-R as well as DDMAT.

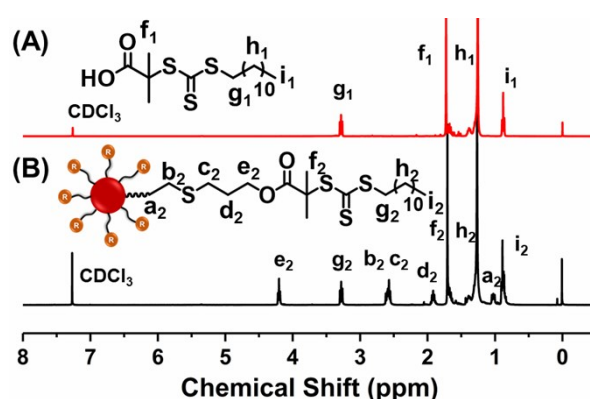

Fig. S1. The  $^1\text{H}$  NMR spectra of DDMAT (A), and POSS-TTC-R (B).

## 2. Synthesis of POSS-(PNIPAM) $_8$ -Z

In the synthesis of POSS-(PNIPAM) $_8$ -Z, the monomer conversion of NIPAM was detected by NMR. Fig. S2 shows the typical  $^1\text{H}$  NMR spectra of raw polymer solution of POSS-(PNIPAM $_{72}$ ) $_8$ -Z in the presence of 1,3,5-trioxane as the internal standard. By comparing the signals at 5.15 ppm (1,3,5-trioxane) and 5.60 ppm (NIPAM), the monomer conversion was obtained.

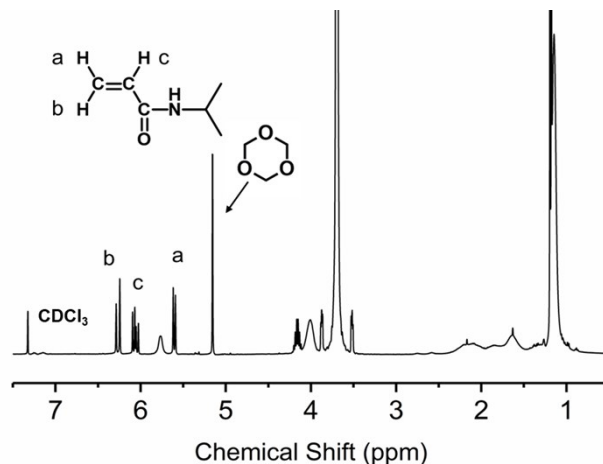

**Fig. S2.** The  $^1\text{H}$  NMR spectra of raw polymer solution of POSS-(PNIPAM<sub>72</sub>)<sub>8</sub>-Z.

Table S1 summarizes the star POSS-(PNIPAM)<sub>8</sub>-Z synthesized by solution RAFT polymerization under different conditions, in which theoretical molecular weight of POSS-(PNIPAM)<sub>8</sub>-Z was determined by eqn S1. And more, the GPC traces of the synthesized POSS-(PNIPAM)<sub>8</sub>-Z are shown in Fig. S3.

$$M_{n,th} = \frac{[\text{monomer}]_0 \times M_{\text{monomer}}}{[\text{CTA}]_0} \times \text{Conversion} + M_{n, \text{CTA}} \quad (\text{S1})$$

**Table S1.** Summary of star POSS-(PNIPAM)<sub>8</sub>-Z synthesized by solution RAFT polymerization.

| Samples | Initiator [I] | [NIPAM] <sub>0</sub> : [CTA] <sub>0</sub> : [I] <sub>0</sub> | Temperatur <sup>e</sup> (°C) | Time (h) | Conv. <sup>a</sup> (%) | <i>M<sub>n</sub></i> (Kg/mol)        |                                       | <i>D</i> <sup>d</sup> |
|---------|---------------|--------------------------------------------------------------|------------------------------|----------|------------------------|--------------------------------------|---------------------------------------|-----------------------|
|         |               |                                                              |                              |          |                        | <i>M<sub>n,th</sub></i> <sup>b</sup> | <i>M<sub>n,GPC</sub></i> <sup>c</sup> |                       |
| S1      | AIBN          | 1600:1:2                                                     | 70                           | 1        | 90                     | 166.1                                | 59.1                                  | 1.96                  |
| S2      | AIBN          | 1600:1:2                                                     | 65                           | 1        | 78                     | 144.4                                | 78.9                                  | 1.78                  |
| S3      | ABVN          | 1600:1:1                                                     | 50                           | 1        | 73                     | 135.3                                | 110.8                                 | 1.41                  |
| S4      | ABVN          | 1600:1:1                                                     | 45                           | 1        | 35                     | 66.7                                 | 109.8                                 | 1.08                  |
| S5      | ABVN          | 1600:1:2                                                     | 45                           | 1        | 49                     | 92.0                                 | 120.3                                 | 1.06                  |

<sup>a</sup> The monomer conversion determined by  $^1\text{H}$  NMR. <sup>b</sup> The theoretical molecular weight determined by monomer conversion according to eqn S1. <sup>c</sup> The molecular weight determined by DMF GPC. <sup>d</sup> The *D* (*M<sub>w</sub>*/*M<sub>n</sub>*) values determined by GPC.

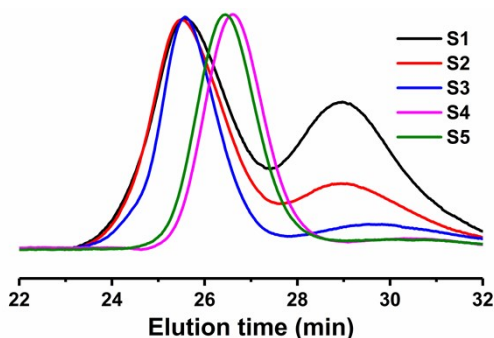

**Fig. S3.** The GPC traces of star POSS-(PNIPAM)<sub>8</sub>-Z synthesized by solution RAFT polymerization.

Under the optimized conditions, the RAFT polymerization employing the POSS-TTC-Z was performed and the polymerization kinetics was explored, the results are shown in Table S2.

**Table S2.** Summary of the star POSS-(PNIPAM)<sub>8</sub>-Z synthesized at different monomer conversions.

| Polymers                                      | [NIPAM] <sub>0</sub> : [CTA] <sub>0</sub> : [ABVN] <sub>0</sub> | Time ( min ) | Conv. <sup>a</sup> (%) | $M_n$ (Kg/mol) |               | $\mathcal{D}^d$ |
|-----------------------------------------------|-----------------------------------------------------------------|--------------|------------------------|----------------|---------------|-----------------|
|                                               |                                                                 |              |                        | $M_{n,th}^b$   | $M_{n,GPC}^c$ |                 |
| POSS-(PNIPAM <sub>39</sub> ) <sub>8</sub> -Z  | 2400:1:2                                                        | 30           | 13                     | 38.6           | 78.9          | 1.09            |
| POSS-(PNIPAM <sub>51</sub> ) <sub>8</sub> -Z  | 2400:1:2                                                        | 40           | 17                     | 49.5           | 106.3         | 1.06            |
| POSS-(PNIPAM <sub>75</sub> ) <sub>8</sub> -Z  | 2400:1:2                                                        | 50           | 25                     | 71.2           | 122.3         | 1.09            |
| POSS-(PNIPAM <sub>96</sub> ) <sub>8</sub> -Z  | 2400:1:2                                                        | 60           | 32                     | 90.2           | 162.5         | 1.14            |
| POSS-(PNIPAM <sub>153</sub> ) <sub>8</sub> -Z | 2400:1:2                                                        | 70           | 51                     | 141.7          | 235.7         | 1.08            |
| POSS-(PNIPAM <sub>195</sub> ) <sub>8</sub> -Z | 2400:1:2                                                        | 80           | 65                     | 179.7          | 288.3         | 1.08            |
| POSS-(PNIPAM <sub>240</sub> ) <sub>8</sub> -Z | 2400:1:2                                                        | 100          | 80                     | 220.4          | 180.2         | 1.66            |

<sup>a</sup> The monomer conversion determined by <sup>1</sup>H NMR. <sup>b</sup> The theoretical molecular weight determined by monomer conversion according to eqn S1. <sup>c</sup> The molecular weight determined by DMF GPC. <sup>d</sup> The  $\mathcal{D}$  ( $M_w/M_n$ ) values determined by GPC.

### 3. Cutting off PNIPAM arms from POSS-(PNIPAM)<sub>8</sub>-Z

Cutting off PNIPAM arms from POSS-(PNIPAM)<sub>8</sub>-Z is shown in Scheme S1. Typically, into a flask with a magnetic stirrer, POSS-(PNIPAM<sub>188</sub>)<sub>8</sub>-Z (1.00 g, 0.0058 mmol), 1-propylamine (5.50 mg 0.093 mmol) and CH<sub>2</sub>Cl<sub>2</sub> (4 mL) were added, and then the mixture was stirred for 24 h at room temperature. The leached PNIPAM was precipitated in iced diethyl ether, collected by three precipitation/filtration cycles,

followed by dried under vacuum at room temperature. The GPC traces of the leached PNIPAM and POSS-(PNIPAM<sub>188</sub>)<sub>8</sub>-Z are shown in Figure S4.

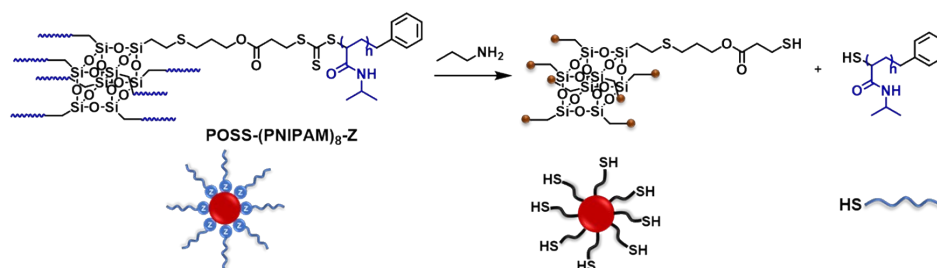

**Scheme S1.** Schematic of cutting PNIPAM arms from the star POSS-(PNIPAM)<sub>8</sub>-Z.

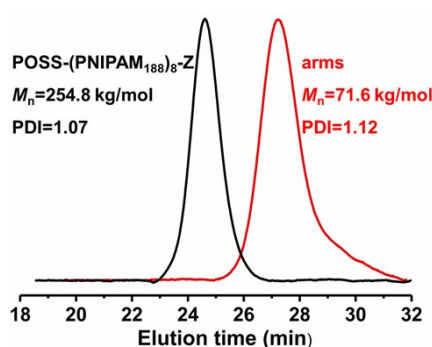

**Fig. S4.** The GPC traces of POSS-(PNIPAM<sub>188</sub>)<sub>8</sub>-Z and the leached PNIPAM<sub>188</sub>.

#### 4. Synthesis of POSS-(PNIPAM)<sub>8</sub>-R

POSS-(PNIPAM)<sub>8</sub>-R was prepared by solution RAFT polymerization using ABVN as initiator and POSS-TTC-R as CTA and the details are summarized in Table 1. Here is a typical synthesis of star POSS-(PNIPAM<sub>70</sub>)<sub>8</sub>-R under [NIPAM]<sub>0</sub>: [POSS-TTC-R]<sub>0</sub>: [ABVN]<sub>0</sub> = 800:1:2. Into a Schlenk flask, NIPAM (2.00 g, 17.6 mmol), POSS-TTC-R (91.0 mg, 0.022 mmol) and ABVN (11.0 mg, 0.044 mmol) dissolved in 1,4-dioxane (8.0 g) were added. The oxygen in the flask was removed by argon purging and the reaction was performed at 45 °C for 80 min. The 70% monomer conversion of NIPAM was detected by <sup>1</sup>H NMR analysis using 1,3,5-trioxane as internal standard. The synthesized POSS-(PNIPAM<sub>70</sub>)<sub>8</sub>-R was precipitated in iced diethyl ether, collected by three precipitation/filtration cycles, followed by dried under

vacuum at room temperature.

## 5. Comparison between the GPC traces of POSS-(PNIPAM<sub>37</sub>)<sub>8</sub>-Z and POSS-(PNIPAM<sub>35</sub>)<sub>8</sub>-R

To make comparison, the GPC traces of POSS-(PNIPAM<sub>37</sub>)<sub>8</sub>-Z and POSS-(PNIPAM<sub>35</sub>)<sub>8</sub>-R are shown in Fig. S5.

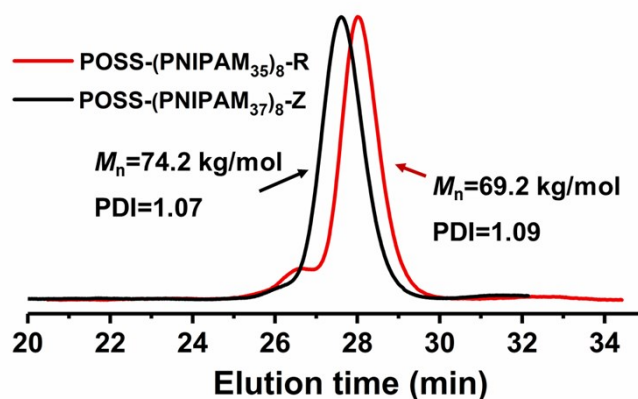

**Fig. S5.** The GPC traces of POSS-(PNIPAM<sub>37</sub>)<sub>8</sub>-Z and POSS-(PNIPAM<sub>35</sub>)<sub>8</sub>-R

## 6. Summary of PTT and $D_h$ of star POSS-(PNIPAM)<sub>8</sub> and linear PNIPAM

**Table S3.** Summary of PTT and  $D_h$  of star and linear samples.

| Polymers                                      | PTT <sub>(%T)</sub> <sup>a</sup><br>(°C) | PTT <sub>(NMR)</sub> <sup>b</sup><br>(°C) | $D_h$ <sup>c</sup> (nm) | PDI <sup>d</sup> |
|-----------------------------------------------|------------------------------------------|-------------------------------------------|-------------------------|------------------|
| POSS-(PNIPAM <sub>72</sub> ) <sub>8</sub> -Z  | 29.5                                     | 31.3                                      | 74                      | 0.125            |
| POSS-(PNIPAM <sub>150</sub> ) <sub>8</sub> -Z | 30.4                                     | 32.4                                      | 86                      | 0.080            |
| POSS-(PNIPAM <sub>188</sub> ) <sub>8</sub> -Z | 30.5                                     | 32.5                                      | 98                      | 0.053            |
| POSS-(PNIPAM <sub>360</sub> ) <sub>8</sub> -Z | 31.2                                     | 33.0                                      | 110                     | 0.036            |
| PNIPAM <sub>141</sub> -Z                      | 30.6                                     | 33.3                                      | 272                     | 0.037            |

<sup>a</sup> The phase transition temperatures (PTT) determined by Temperature-dependent transmittance of 1.0 wt% aqueous solution of star and linear polymers. <sup>b</sup> The PTTs determined by variable temperature <sup>1</sup>H NMR spectra of the 1.0 wt% star and linear polymers solution of D<sub>2</sub>O. <sup>c</sup> Hydrodynamic diameter distribution  $f(D_h)$  of 0.05 wt% aqueous solution of star and linear polymers at 40 °C. <sup>d</sup> Polydispersity index (PDI) of  $D_h$ .

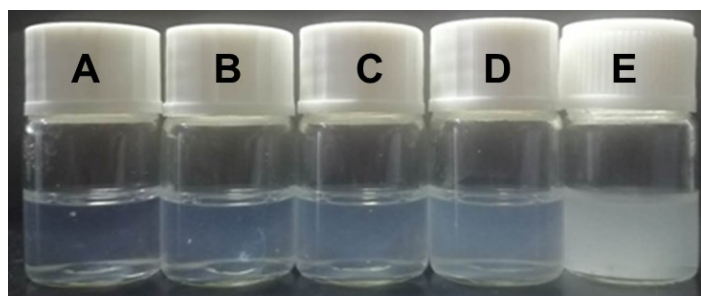

**Fig. S6.** Images of 0.05 wt% aqueous solution of star POSS-(PNIPAM<sub>72</sub>)<sub>8</sub>-Z (A), star POSS-(PNIPAM<sub>150</sub>)<sub>8</sub>-Z (B), star POSS-(PNIPAM<sub>188</sub>)<sub>8</sub>-Z (C), star POSS-(PNIPAM<sub>360</sub>)<sub>8</sub>-Z (D) and linear PNIPAM<sub>141</sub>-Z (E) at 40 °C.

### 7. On the emulsion stabilized by POSS-(PNIPAM)<sub>8</sub>

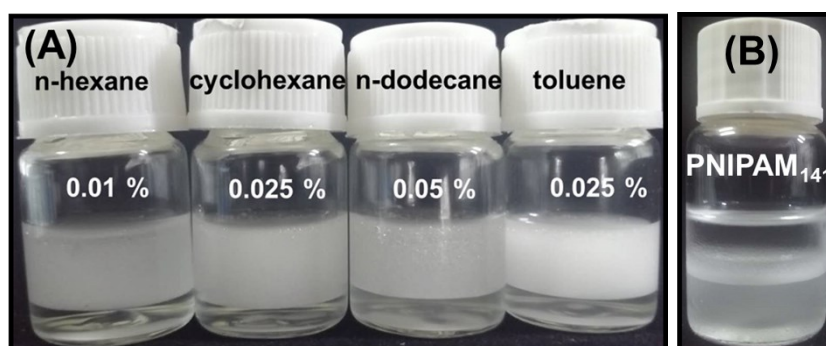

**Fig. S7.** Images of oil-in-water emulsions using POSS-(PNIPAM<sub>72</sub>)<sub>8</sub>-Z as emulsifier (A) and images of toluene-in-water emulsion stabilized by 0.10 wt% PNIPAM<sub>141</sub>-Z (B).

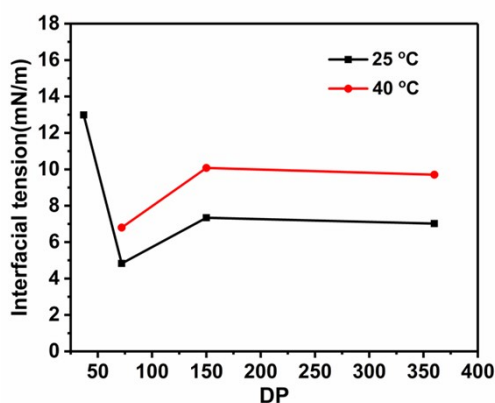

**Fig. S8.** The toluene/water interfacial tension in the presence of 0.10 wt% of POSS-(PNIPAM<sub>37</sub>)<sub>8</sub>-Z, POSS-(PNIPAM<sub>72</sub>)<sub>8</sub>-Z, POSS-(PNIPAM<sub>150</sub>)<sub>8</sub>-Z and POSS-(PNIPAM<sub>360</sub>)<sub>8</sub>-Z at 25 °C and 40 °C. Note: the toluene/water interfacial tension in the presence of 0.10 wt% of POSS-(PNIPAM<sub>37</sub>)<sub>8</sub>-Z at 40 °C is not shown, since it is out of the analysis due to it becoming milky at this temperature.
